# Supplementary material
Source: publisher figshare collection journal article supplement (https://tandf.figshare.com/ndownloader/files/17875646)
Supplement: Supplementary file 1 [file 17875646]

Synthesis, characterization and biological activities evaluation of novel sulfanyl derivatives.

Kamuran Saraça and Cahit Orekb

aDepartment of Chemistry, Faculty of Arts and Science, Bitlis Eren University, 13000 Bitlis, Turkey.

bDepartment of Genetics and Bioengineering, Faculty of Engineering and Architecture, Kastamonu University, 37000, Kastamonu, Turkey.

Email: ksarac@beu.edu.tr

**Supplemental Materials**

**Table S 1** Antibacterial activities of synthesized compounds (μg mL-1 minimum inhibition concentration values)

|  | ***Listeria monocytogenes*** | ***B.subtilis*** | ***S.typhimurium*** | ***Proteus vulgaris*** |
| --- | --- | --- | --- | --- |
| **6a** | 256 | 256 | 512 | 1024 |
| **6b** | 256 | 128 | 512 | 512 |
| **6c** | 64 | 128 | 128 | 64 |
| **6d** | 128 | 512 | 256 | 128 |
| ***Ampisilin*** | 2 | 2 | 2 | 2 |

**Table S 2** DPPH radical scavenging activities of the synthesized compounds (%)

| **Compounds and Standards** | **DPPH *% Inhibition***  **50 µg/mL** | **DPPH *% Inhibition***  **100 µg/mL** | **DPPH *% Inhibition***  **250 µg/mL** |
| --- | --- | --- | --- |
| **6a** | 47.2 ± 0.02 | 54.23 ± 0.12 | 53.56 ± 1.23 |
| **6b** | 53.3 ± 0.01 | 52.1 ± 0.1 | 56.2 ± 1.23 |
| **6c** | 60. 8 ± 1.1 | 62.3 ± 2.12 | 71.3 ± 3.09 |
| **6d** | 55.43 ± 3.19 | 60.48 ± 2.01 | 63.1 ± 0.12 |
| **α-tocopherol** | 74.3 ± 0.1 | 72.2 ± 0.11 | 77.2 ± 0.02 |
| **BHT** | 56.4 ± 0.12 | 64.6 ± 1.03 | 68.6 ± 0.01 |





**Figure S 1:** FT-IR spectrum of 4a


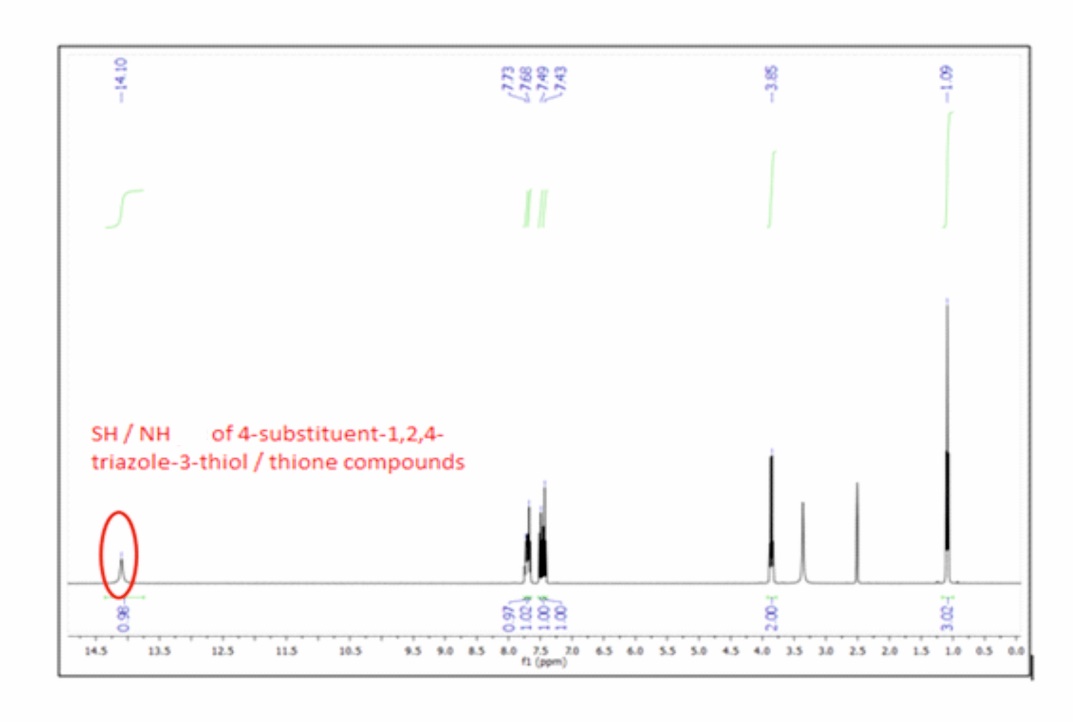


**Figure S 2:** 1H NMR spectrum of 4a


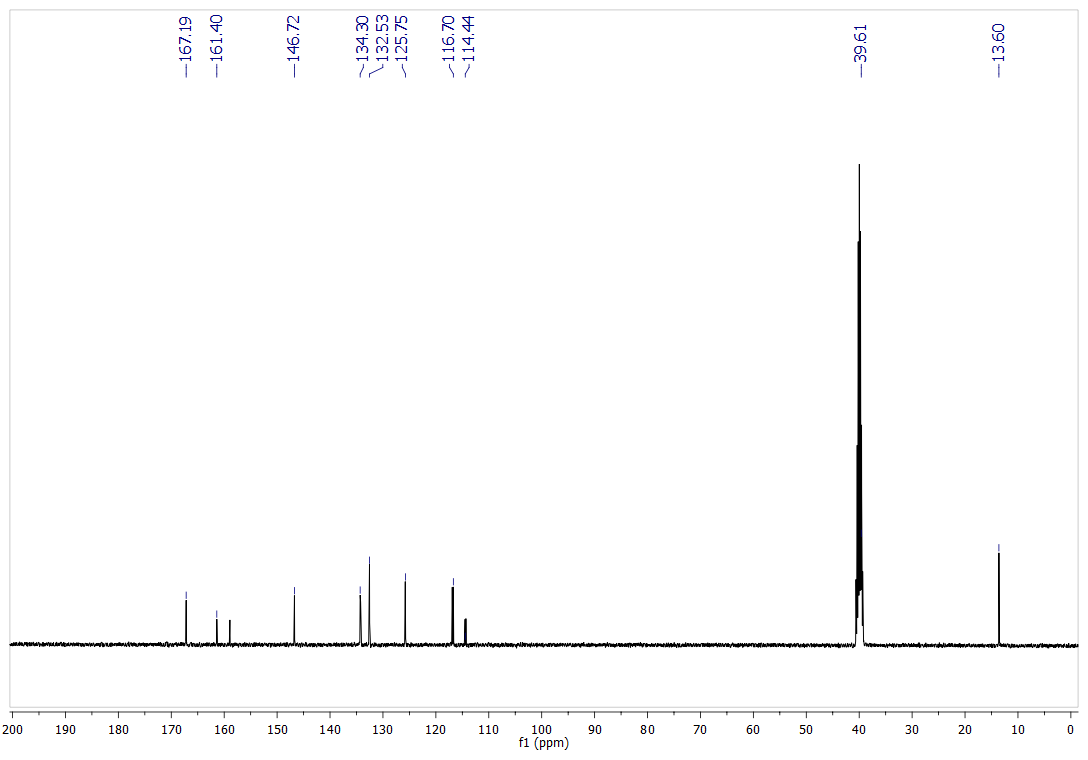


**Figure S 3:** 13C NMR spectrum of 4a





**Figure S 4**: FT-IR spectrum of 4b


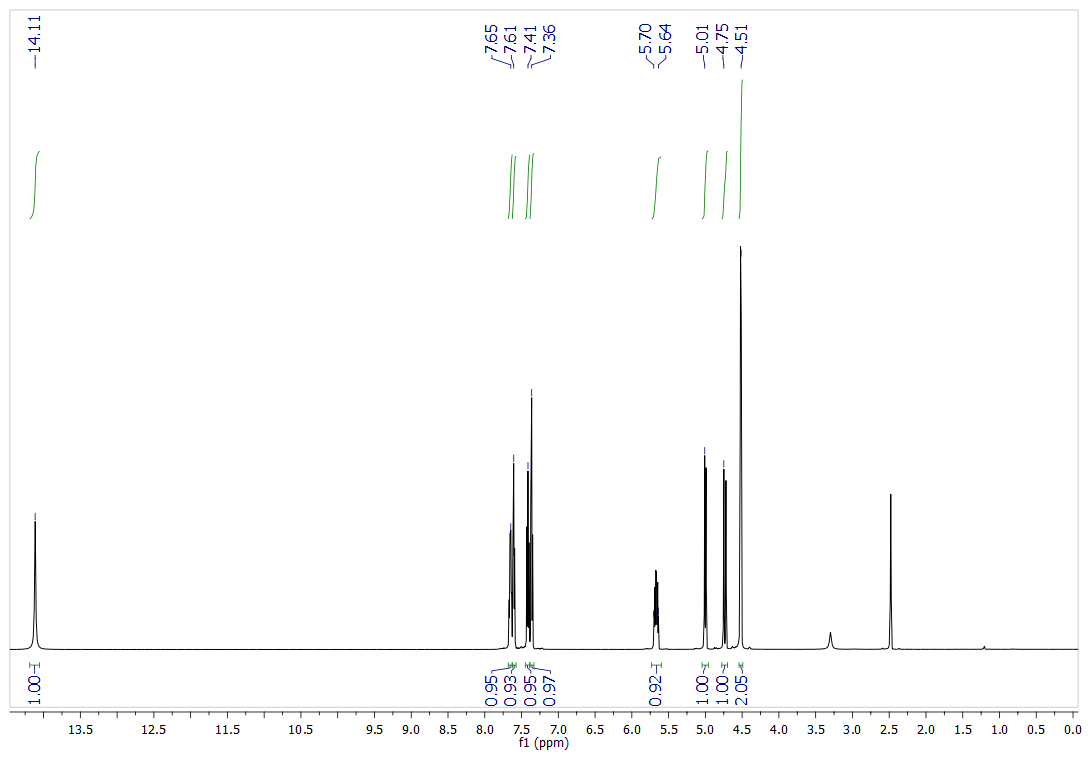


**Figure S 5:** 1H NMR spectrum of 4b


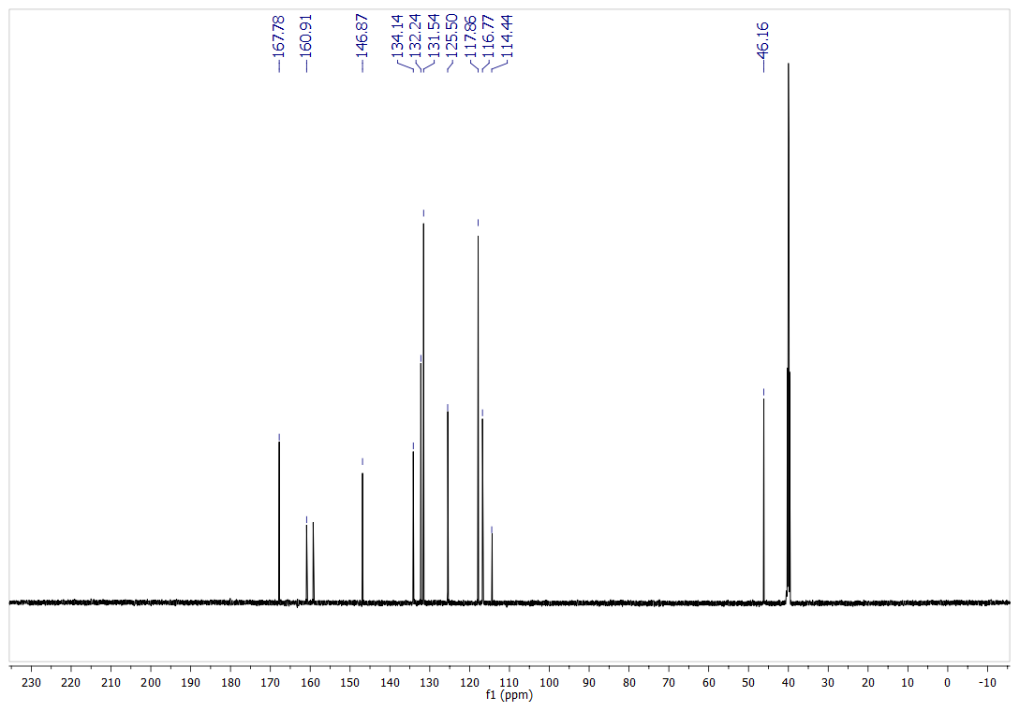


**Figure S 6**: 13C NMR spectrum of 4b


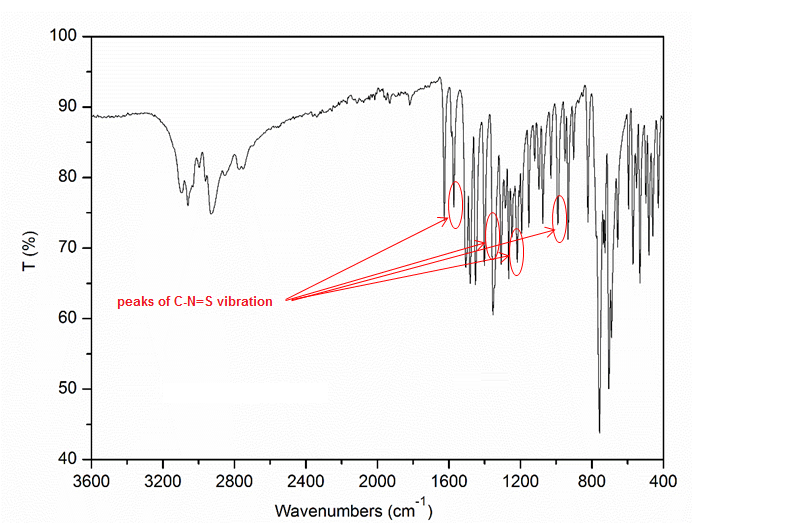


**Figure S 7**: FT-IR spectrum of 4c


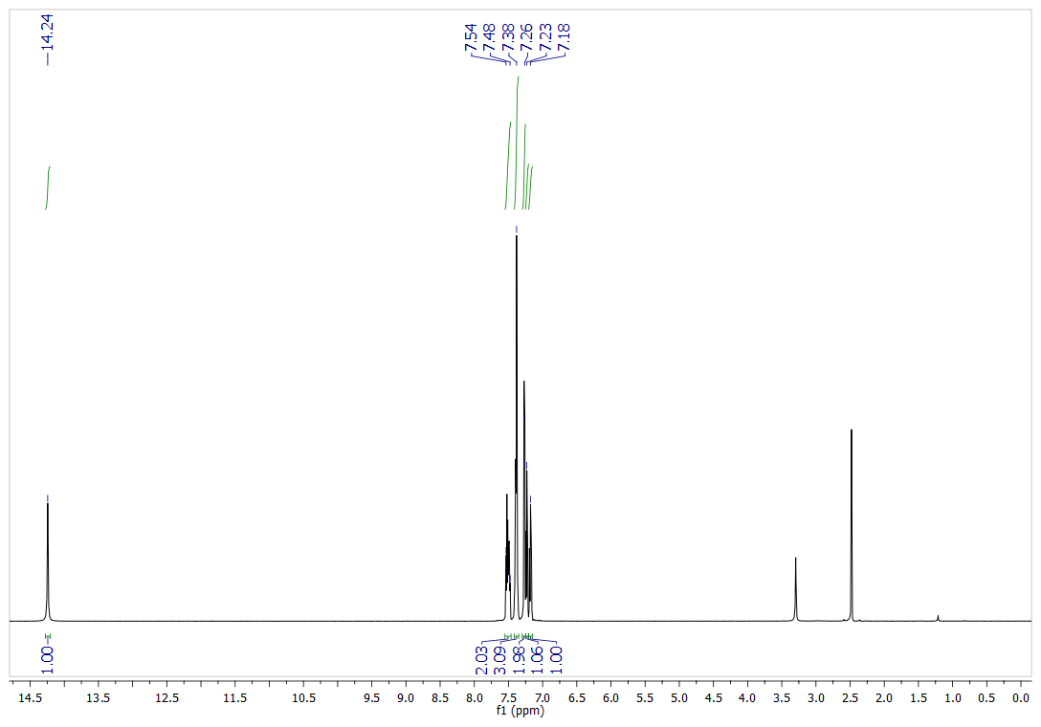


**Figure S 8:** 1H NMR spectrum of 4c

**
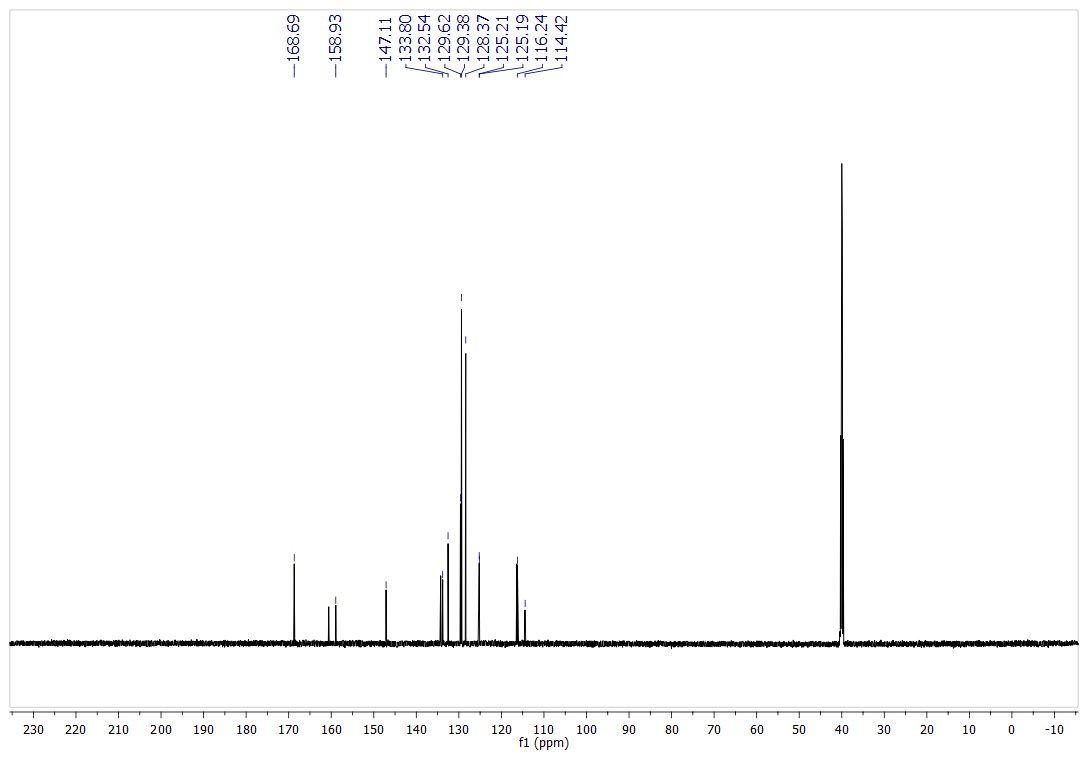
**

**Figure S 9**: 13C NMR spectrum of 4c





**Figure S 10**: FT-IR spectrum of 4d

*
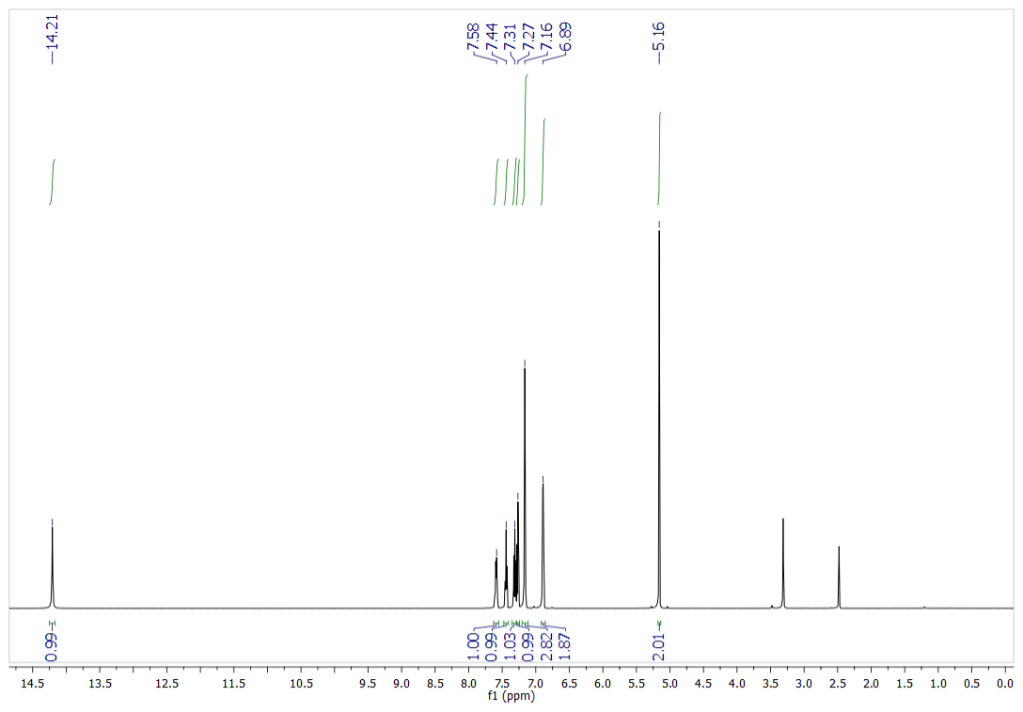
*

**Figure S 11:** 1H NMR spectrum of 4d


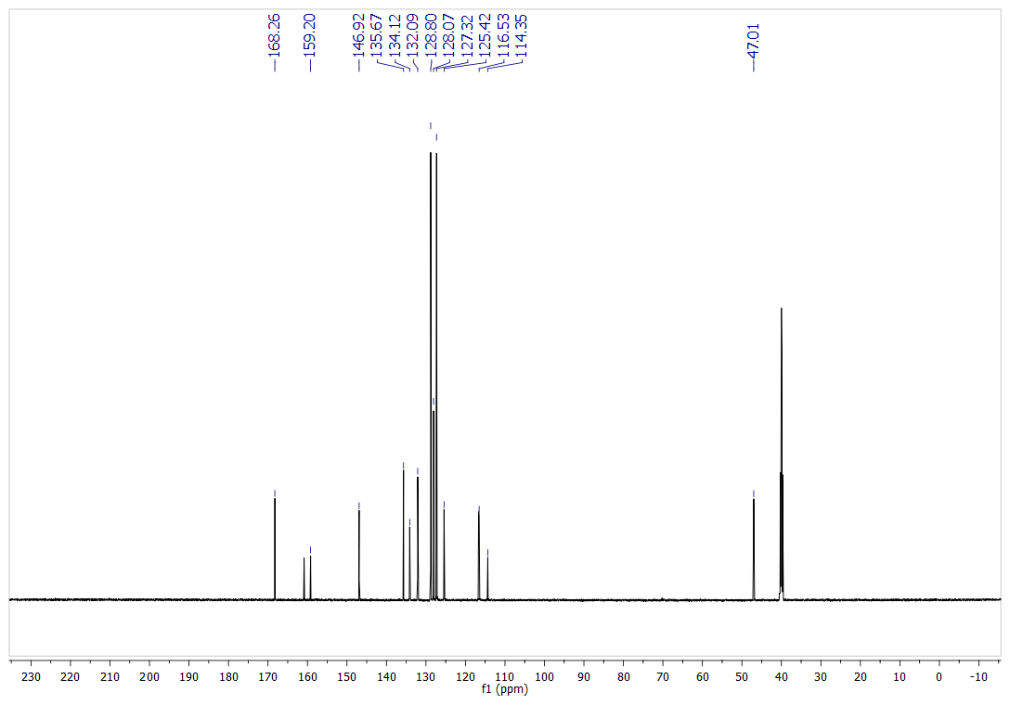


**Figure S 12**: 13C NMR spectrum of 4d





**Figure S 13:** FT-IR spectrum of 6a


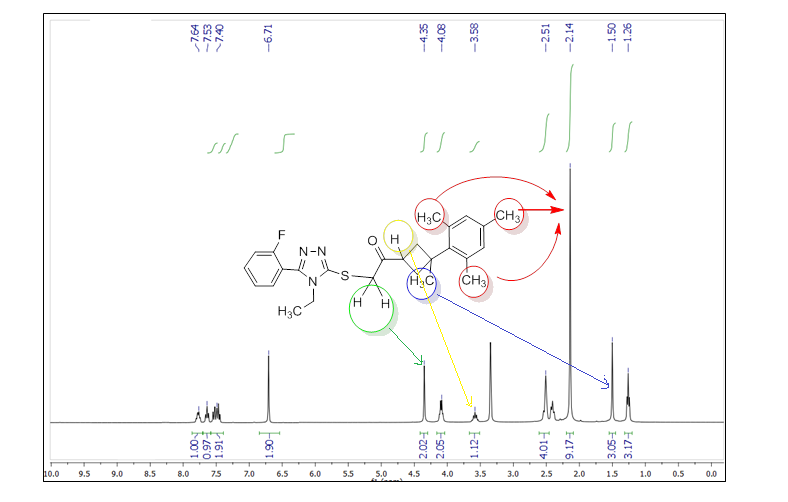


**Figure S 14**: 1 H NMR spectrum of 6a


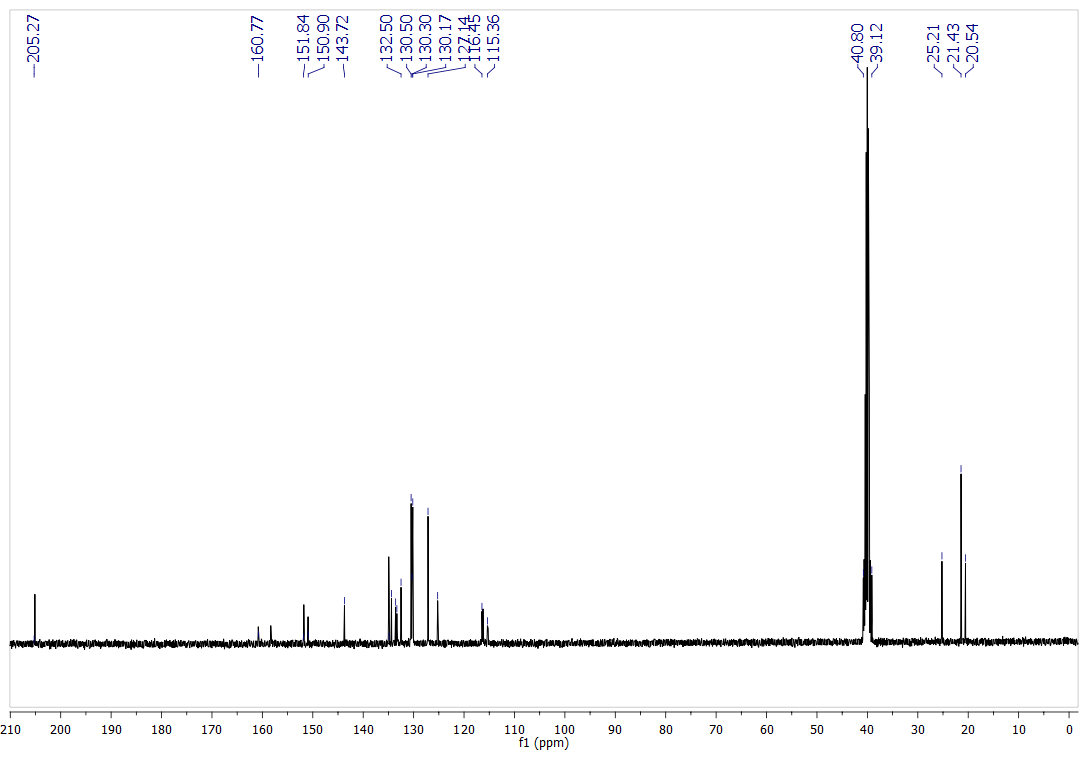


**Figure S 15**: 13C NMR spectrum of 6a





**Figure S 16:** FT-IR spectrum of 6b


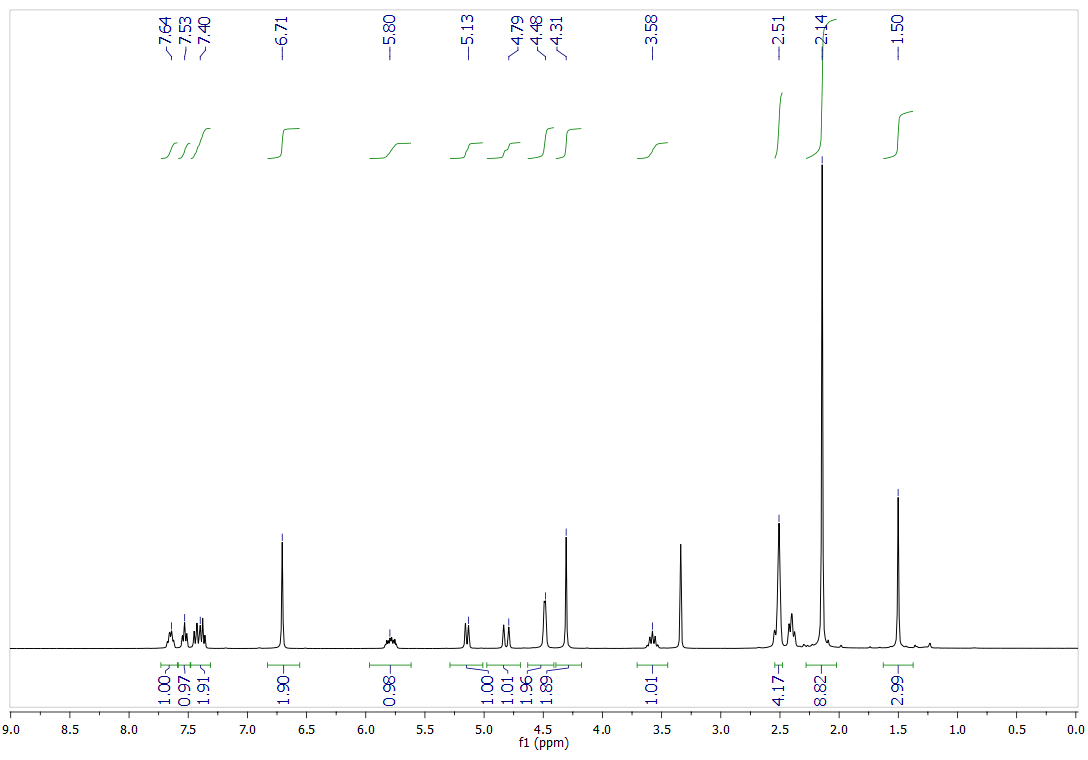


**Figure S 17:** 1H NMR spectrum of 6b


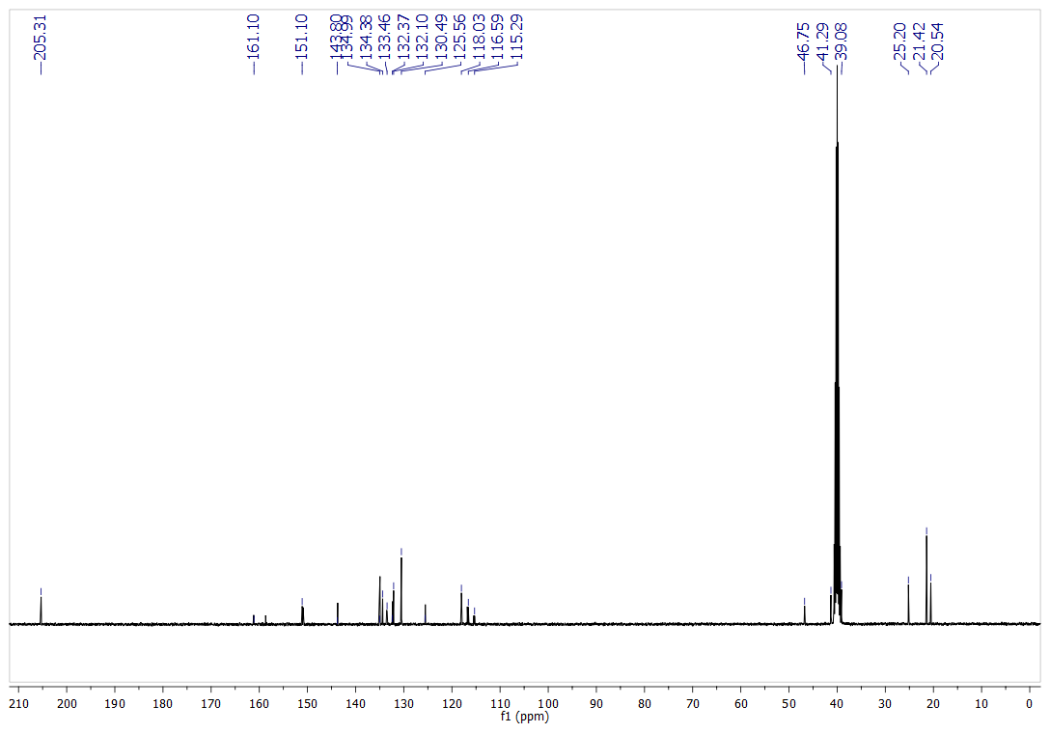


**Figure S 18:** 13C NMR spectrum of 6b





**Figure S 19**: FT-IR spectrum of 6c


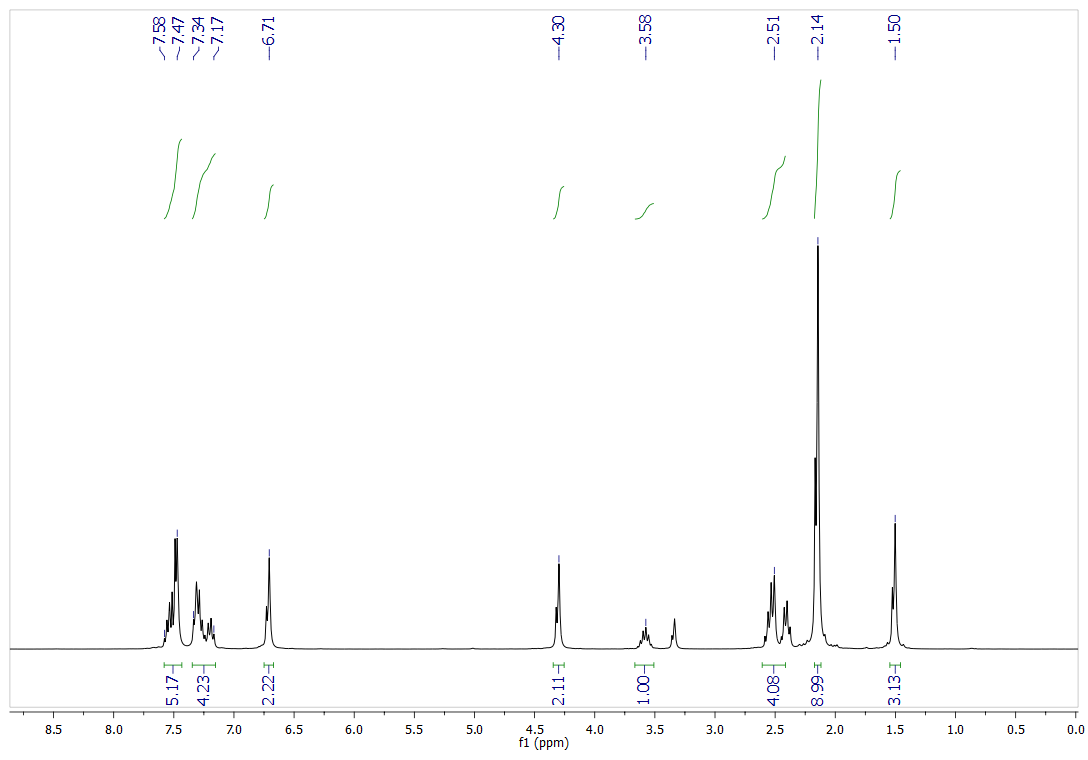


**Figure S 20**: 1H NMR spectrum of 6c


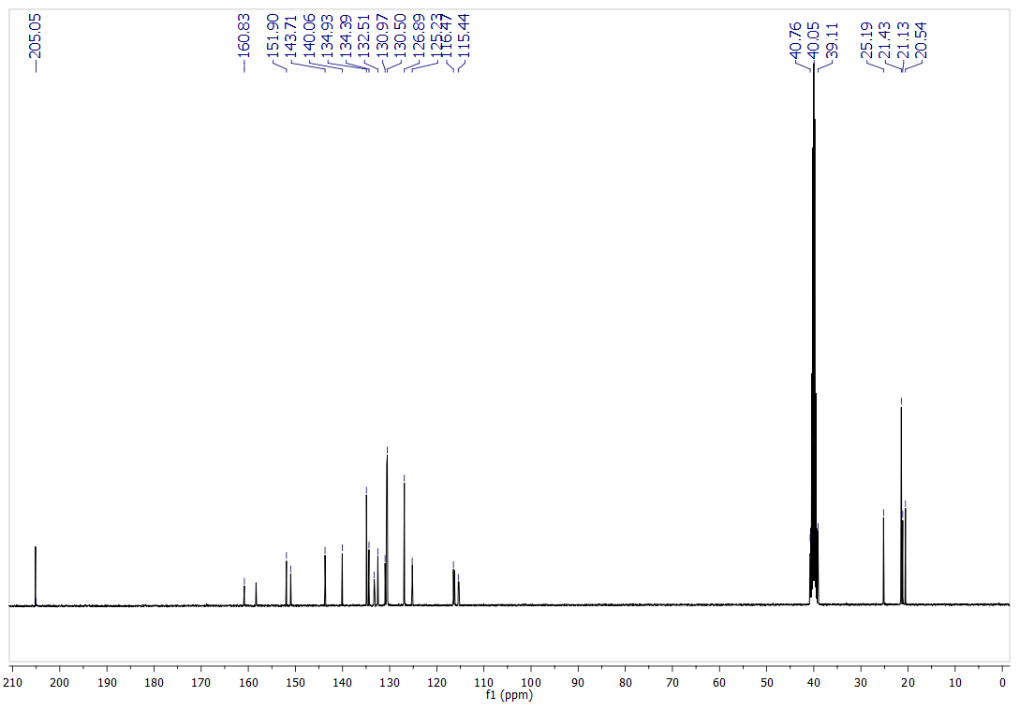


**Figure S 21:** 13C NMR spectrum of 6c





**Figure S 22**: FT-IR spectrum of 6d


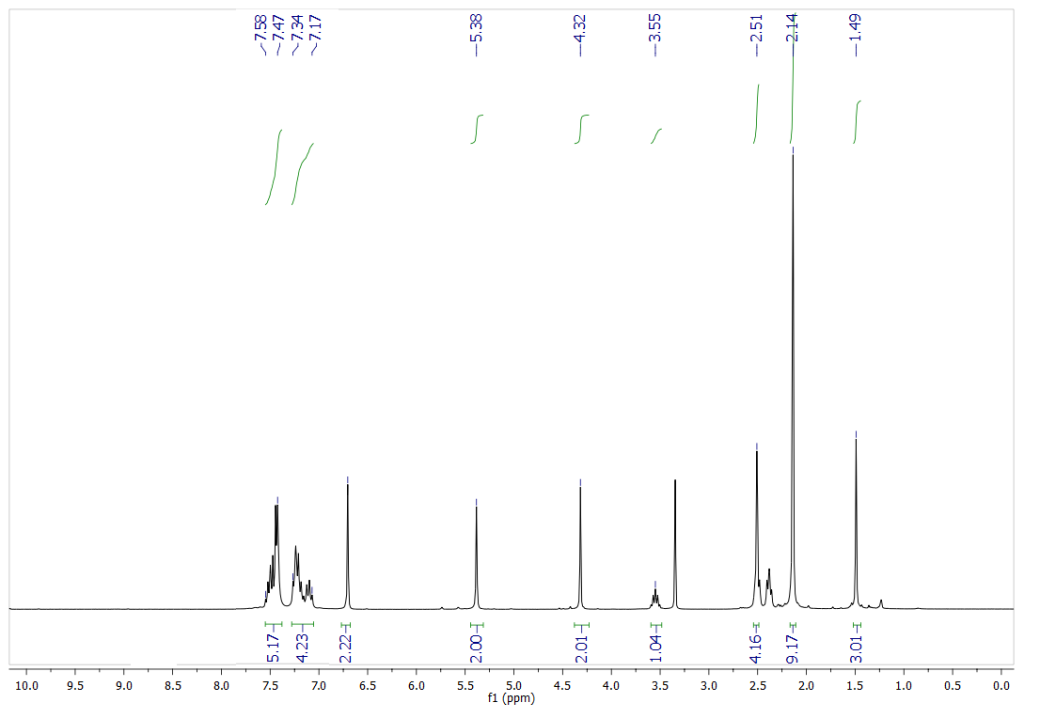


**Figure S 23:** 1H NMR spectrum of 6d


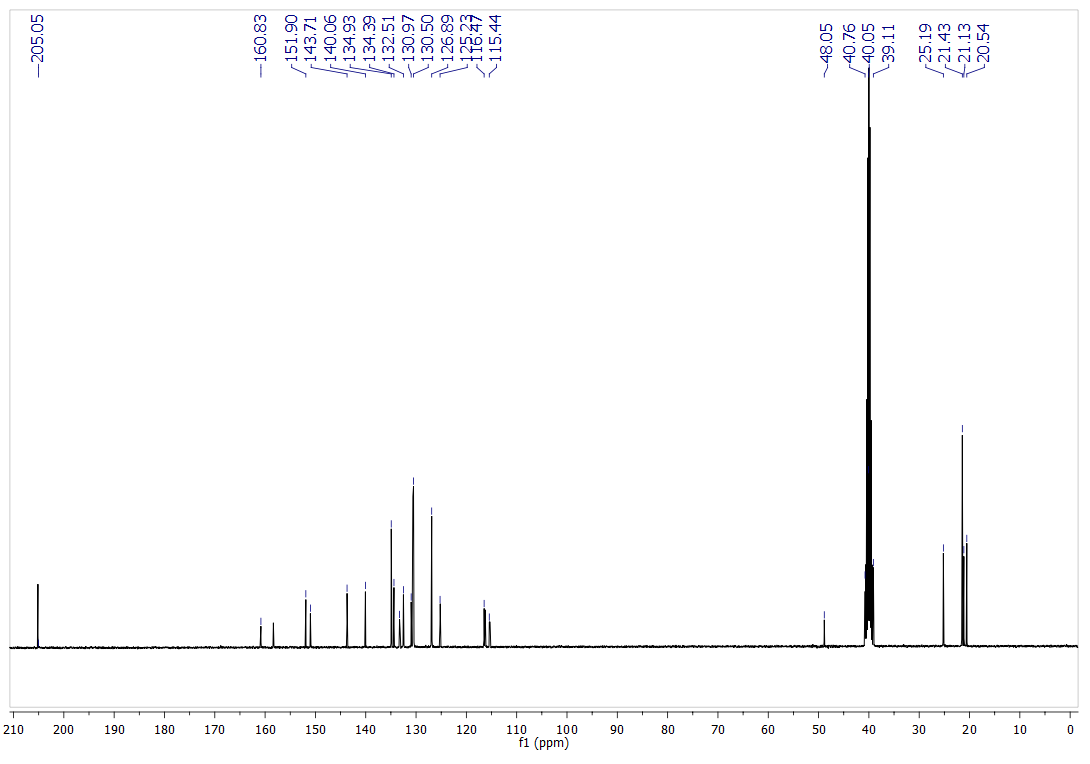


**Figure S 24:** 13C NMR spectrum of 6d
